# Supplementary material
Source: MDPI journal article supplement (https://www.mdpi.com/2306-5338/5/3/42)
Supplement: s1 [file s1]

## Supplementary Material

for

# Hydrologic Characteristics of Streamflow in the Southeast Atlantic and Gulf Coast Hydrologic Region during 1939–2016 and Conceptual Map of Potential Impacts

Aavudai Anandhi <sup>1</sup>, Christy Crandall <sup>2</sup> and Chance Bentley <sup>3</sup>

<sup>1</sup> Biological Systems Engineering, College of Agriculture and Food Sciences, Florida A&M University, Tallahassee, Florida; anandhi@famu.edu

<sup>2</sup> School of the Environment, Florida A&M University, Tallahassee, Florida; christy.crandall@famu.edu

<sup>3</sup> College of Agriculture and Food Sciences, Florida A&M University, Tallahassee, Florida;

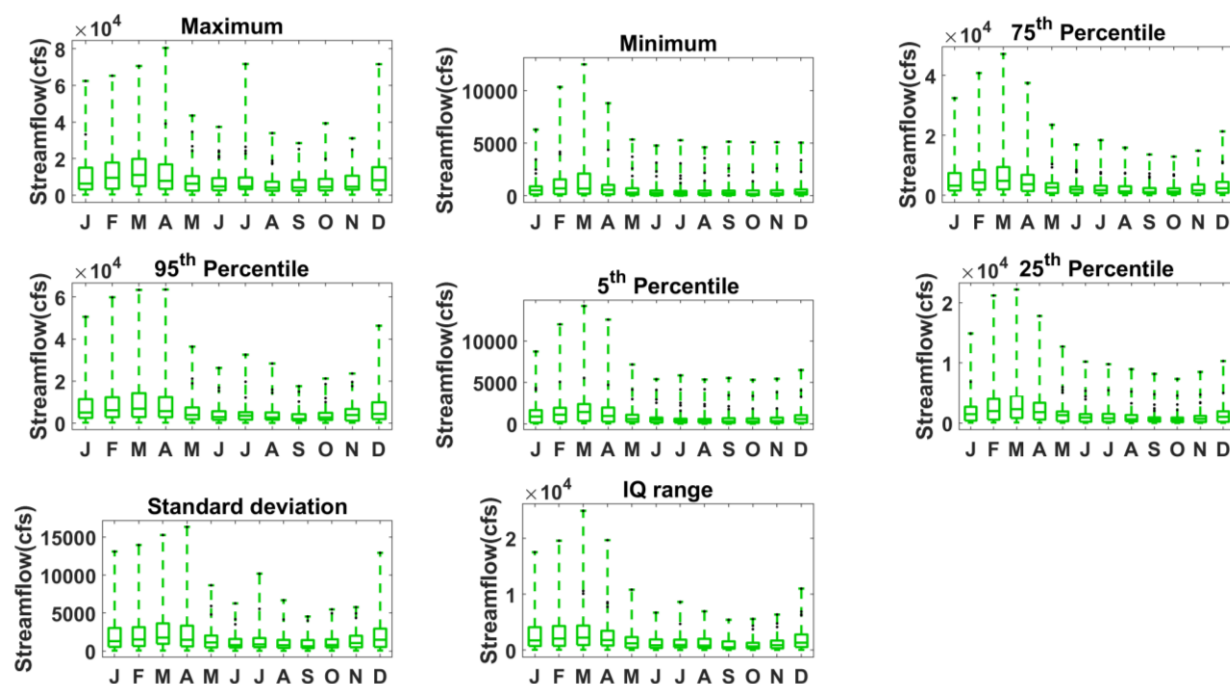

**Figure S1.** Monthly distribution of streamflow statistics from the 30 stations during the study period 1939–2016.

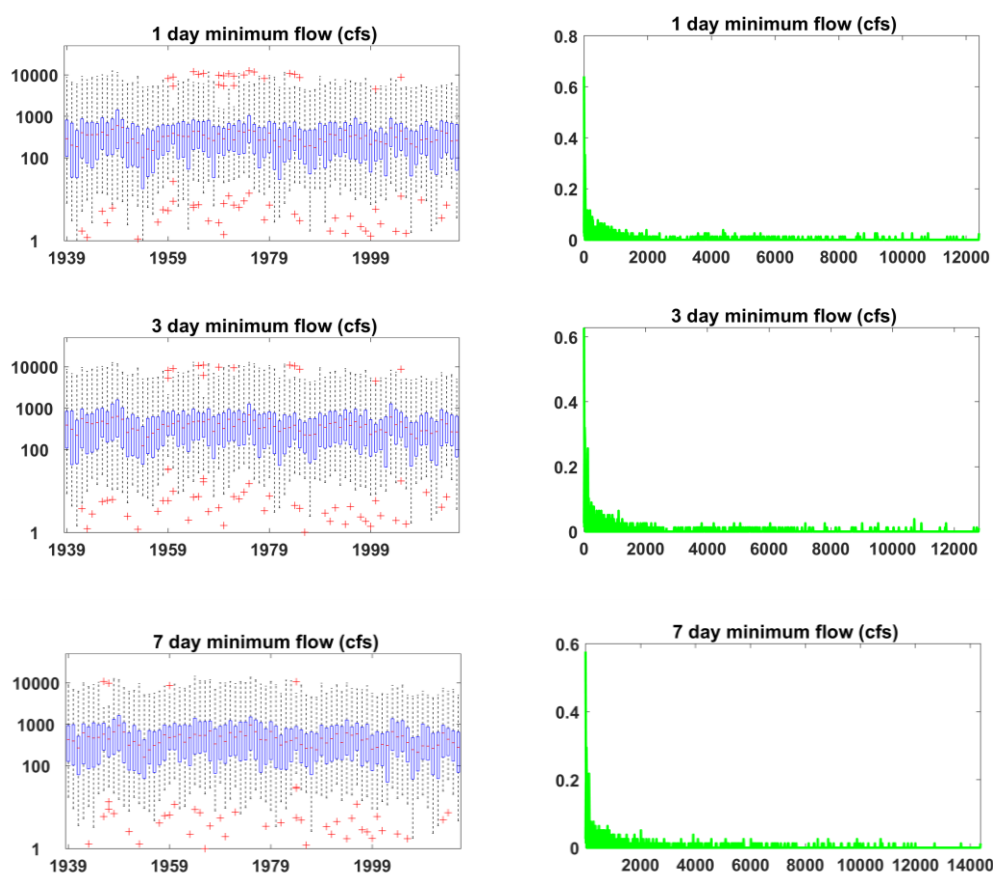

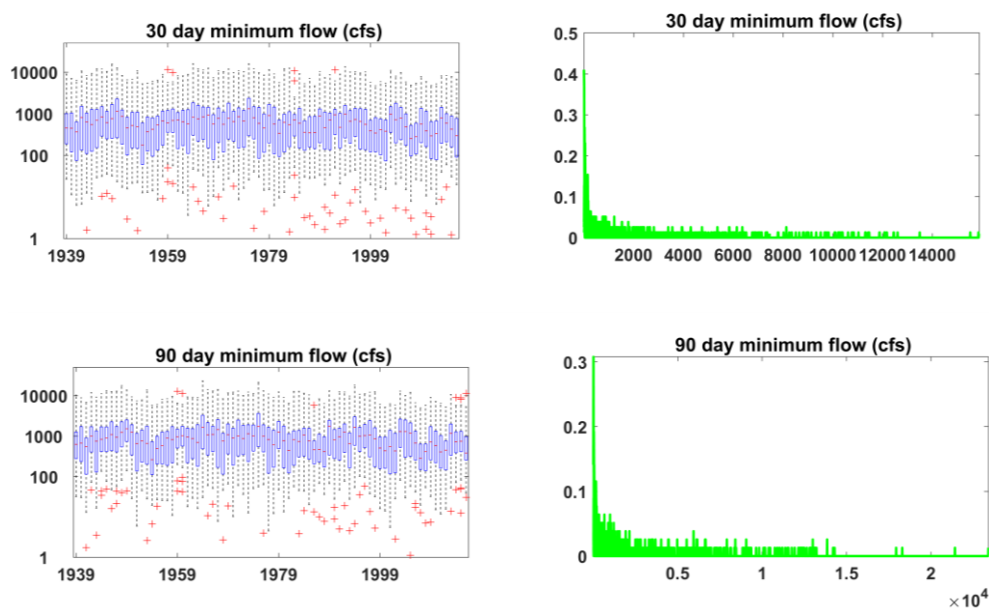

**Figure S2.** Boxplot of annual distribution of magnitude of low flow streamflow statistics from the 30 stations during the study period 1939–2016.

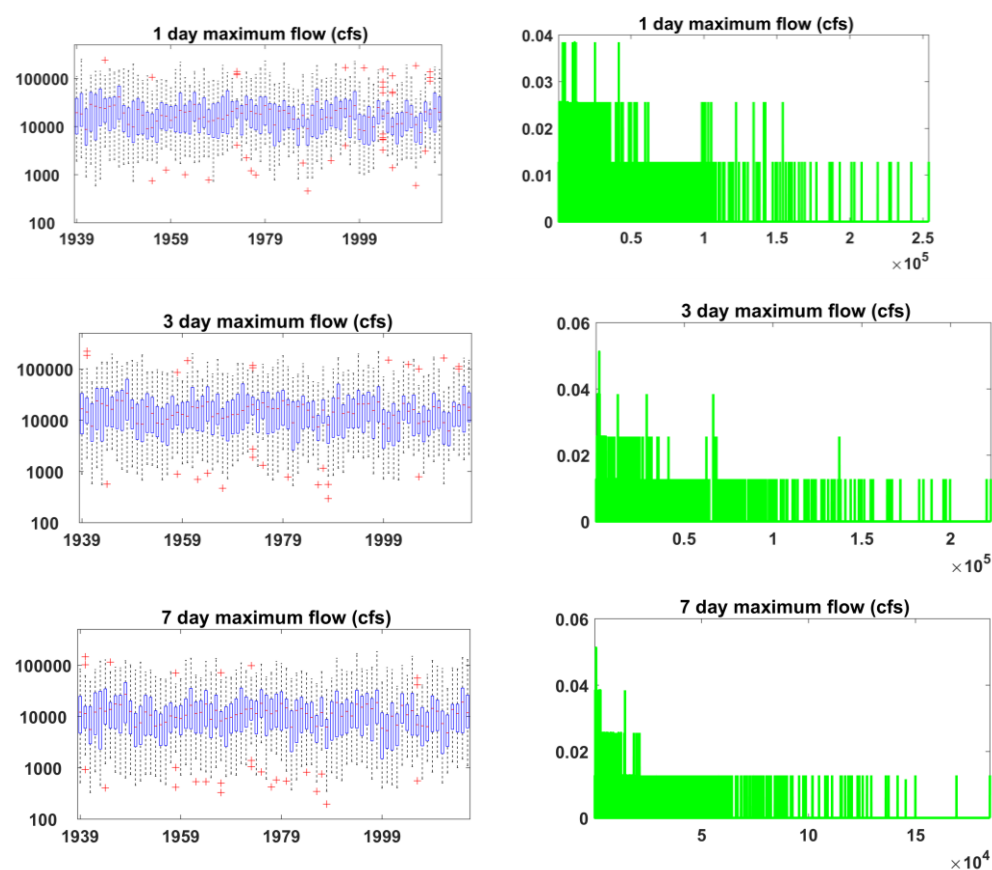

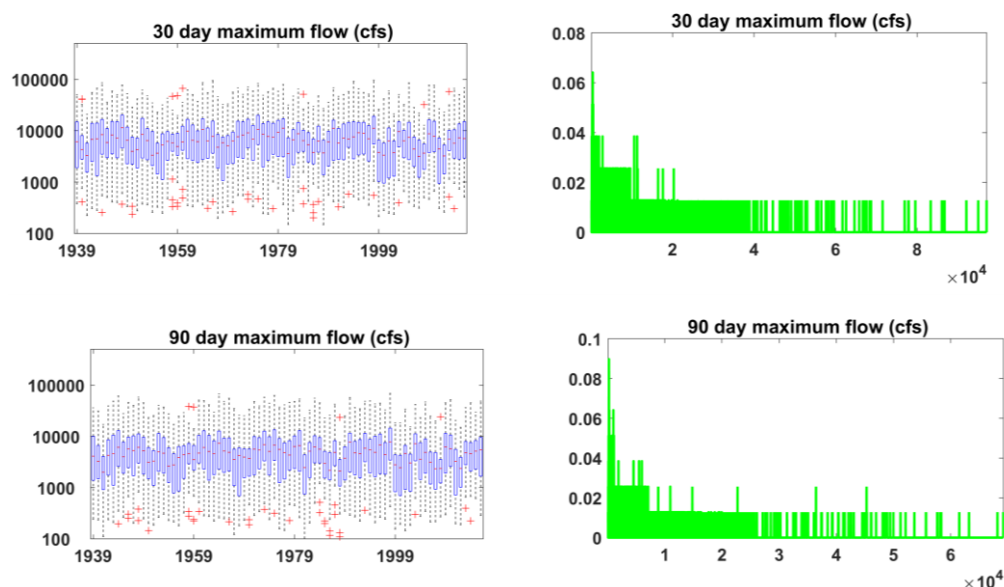

**Figure S3.** Boxplot of annual distribution of magnitude of low flow streamflow statistics from the 30 stations during the study period 1939–2016.

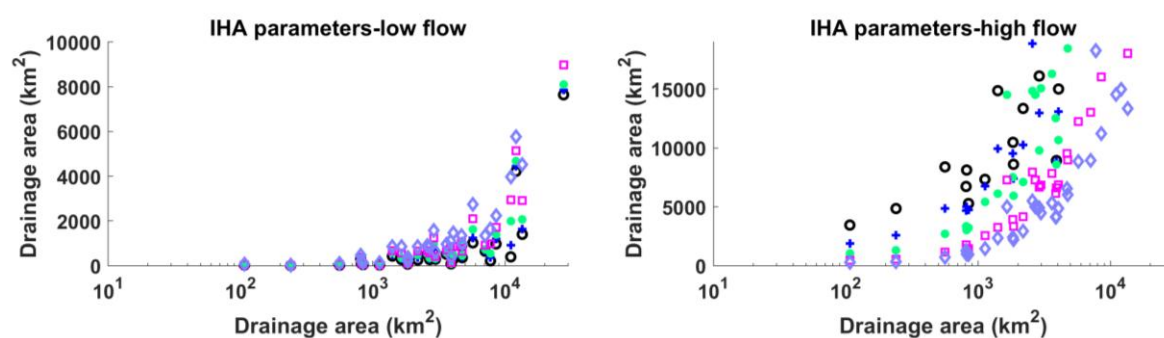

**Figure S4.** Scatter plot to represent the relationship was observed between the low and high flow parameters and the drainage area.

**Table S1.** Documentation of the literature was reviewed using search words (in quotes) and the corresponding number of studies (in parenthesis).

|       |                             |                                |                                      |                                     |
|-------|-----------------------------|--------------------------------|--------------------------------------|-------------------------------------|
| 1     | "ROANOKE RIVER"<br>(5,750)  | "ROANOKE RIVER<br>basin" (788) | "ROANOKE RIVER<br>streamflow" (none) | "ROANOKE RIVER<br>hydrology" (2)    |
| 2     | "FISHING CREEK"<br>(1840)   | "FISHING CREEK<br>basin" (8)   | "FISHING CREEK<br>streamflow" (none) | "FISHING CREEK<br>hydrology" (none) |
| 3**** | "FLAT RIVER " NC<br>(1,010) | "FLAT RIVER basin"<br>NC (18)  | "FLAT RIVER<br>streamflow" NC (none) | "FLAT RIVER<br>hydrology" NC (none) |
| 4     | "NEUSE RIVER"<br>(9,860)    | "NEUSE RIVER<br>basin" (1,620) | "NEUSE RIVER<br>streamflow" (4)      | "NEUSE RIVER<br>hydrology" (1)      |
| 5^    | "DEEP RIVER " (5,380)       | "DEEP RIVER basin"<br>(582)    | "DEEP RIVER<br>streamflow" (none)    | "DEEP RIVER<br>hydrology" (none)    |
| 6     | "YADKIN RIVER "<br>(1640")  | "YADKIN RIVER<br>basin" (117)  | "YADKIN RIVER<br>streamflow" (none)  | "YADKIN RIVER<br>hydrology" (none)  |

|     |                                        |                                          |                                                |                                               |
|-----|----------------------------------------|------------------------------------------|------------------------------------------------|-----------------------------------------------|
| 7   | "PEE DEE RIVER "<br>(2,300)            | "PEE DEE RIVER<br>basin" (264)           | "PEE DEE RIVER<br>streamflow"(1)               | "PEE DEE RIVER<br>hydrology" (none)           |
| 8   | "LINVILLE RIVER "<br>(311)             | "LINVILLE RIVER<br>basin" (7)            | "LINVILLE RIVER<br>streamflow" (none)          | "LINVILLE RIVER<br>hydrology" (none)          |
| 9** | "BROAD RIVER "<br>(13,900)             | "BROAD RIVER<br>basin" (513)             | "BROAD RIVER<br>streamflow" (none)             | "BROAD RIVER<br>hydrology" (none)             |
| 10  | "SALUDA RIVER "<br>(912)               | "SALUDA RIVER<br>basin" (64)             | "SALUDA RIVER<br>streamflow" (none)            | "SALUDA RIVER<br>hydrology" (none)            |
| 11  | " SAVANNAH RIVER<br>" (96,000)         | " SAVANNAH RIVER<br>basin" (868)         | " SAVANNAH RIVER<br>streamflow" (5)            | " SAVANNAH RIVER<br>hydrology" (5)            |
| 12  | " OCMULGEE RIVER<br>" (1430)           | " OCMULGEE RIVER<br>basin" (71)          | " OCMULGEE RIVER<br>streamflow" (none)         | " OCMULGEE RIVER<br>hydrology" (none)         |
| 13  | " OCONEE RIVER "<br>(2,250)            | " OCONEE RIVER<br>basin" (163)           | " OCONEE RIVER<br>streamflow" (1)              | " OCONEE RIVER<br>hydrology" (none)           |
| 14* | " ST. MARYS RIVER "<br>Florida (1,760) | " ST. MARYS RIVER<br>basin" florida (43) | " ST. MARYS RIVER<br>streamflow" (none)        | " ST. MARYS RIVER<br>hydrology" (none)        |
| 15  | " SUWANNEE RIVER<br>" (15,000)         | " SUWANNEE RIVER<br>basin" (876)         | " SUWANNEE RIVER<br>streamflow" (5)            | " SUWANNEE RIVER<br>hydrology" (1)            |
| 16  | " OCHLOCKONEE<br>RIVER " (827)         | " OCHLOCKONEE<br>RIVER basin" (76)       | " OCHLOCKONEE<br>RIVER streamflow"<br>(none)   | " OCHLOCKONEE<br>RIVER hydrology"<br>(none)   |
| 17  | "<br>CHATTAHOOCHEE<br>RIVER " (7,110)  | "<br>CHATTAHOOCHEE<br>RIVER basin" (605) | " CHATTAHOOCHEE<br>RIVER streamflow"<br>(none) | " CHATTAHOOCHEE<br>RIVER hydrology"<br>(none) |
| 18  | " FLINT RIVER "<br>(7,520)             | " FLINT RIVER basin"<br>(1,840)          | " FLINT RIVER<br>streamflow" (14)              | " FLINT RIVER<br>hydrology" (2)               |
| 19  | " APALACHICOLA<br>RIVER " (6,150)      | " APALACHICOLA<br>RIVER basin" (425)     | " APALACHICOLA<br>RIVER streamflow"<br>(none)  | " APALACHICOLA<br>RIVER hydrology" (1)        |
| 20  | " OOSTANAULA<br>RIVER " (295)          | " OOSTANAULA<br>RIVER basin" (2)         | " OOSTANAULA RIVER<br>streamflow" (none)       | " OOSTANAULA<br>RIVER hydrology"<br>(none)    |
| 21  | " ETOWAH RIVER "<br>(1,580)            | " ETOWAH RIVER<br>basin" (343)           | " ETOWAH RIVER<br>streamflow" (1)              | " ETOWAH RIVER<br>hydrology" (none)           |
| 22  | " TALLAPOOSA<br>RIVER " (3,760)        | "TALLAPOOSA<br>RIVER basin" (54)         | " TALLAPOOSA RIVER<br>streamflow" (none)       | " TALLAPOOSA<br>RIVER hydrology"<br>(none)    |
| 23  | " CAHABA RIVER "<br>(1,390)            | "CAHABA RIVER<br>basin" (86)             | " CAHABA RIVER<br>streamflow" (none)           | " CAHABA RIVER<br>hydrology" (none)           |

|    |                                 |                                  |                                          |                                         |
|----|---------------------------------|----------------------------------|------------------------------------------|-----------------------------------------|
| 24 | " BLACK WARRIOR RIVER " (1,940) | "BLACK WARRIOR RIVER basin" (89) | " BLACK WARRIOR RIVER streamflow" (none) | " BLACK WARRIOR RIVER hydrology" (none) |
|----|---------------------------------|----------------------------------|------------------------------------------|-----------------------------------------|

- Search Results in google scholar on 3/30/2018
- \* results could include St Marys River flowing through Ontario (Canada) and Michigan (US); without Florida the values were " ST. MARYS RIVER " Florida (3,100) " ST. MARYS RIVER basin" (47) " ST. MARYS RIVER streamflow" (none) " ST. MARYS RIVER hydrology" (1)
- \*\* results could include Broad River, a tributary of Savannah river in Georgia
- \*\*\*\* results could include other Flat River's that are flowing through Michigan, Rode Island. Without NC the values were "FLAT RIVER " (3,610) "FLAT RIVER basin" (65) "FLAT RIVER streamflow" (none) "FLAT RIVER hydrology" (none)
- ^ results could include Deep river town and other establishments when NC not included "DEEP RIVER " (20,400) "DEEP RIVER basin" (551) "DEEP RIVER streamflow" (none) "DEEP RIVER hydrology" (none)

**Table S2.** Summary of missing data by station and missing-time period intervals.

| USGS<br>STATION ID | STATION NAME                                                   | NMISS | MISSING<br>INTERVAL 1                                 | MISSING<br>INTERVAL 2                                     |
|--------------------|----------------------------------------------------------------|-------|-------------------------------------------------------|-----------------------------------------------------------|
| 02056000           | ROANOKE RIVER at NIAGARA, VA                                   | 4     | 12/09/2016--<br>12/10/2016                            | 01/08/2017--<br>01/10/2017                                |
| 02080500           | ROANOKE RIVER at ROANOKE RAPIDS, NC                            | 2     | 10/1/1993                                             | 10/1/1995                                                 |
| 02083000           | FISHING CREEK NEAR at ENFIELD, NC                              | 2     | 10/1/1993                                             | 10/1/1995                                                 |
| 02085500           | FLAT RIVER at BAHAMA, NC                                       | 4     | 11/16/2017--<br>11/17/2017                            | 03/01/2017--<br>03/02/2017                                |
| 02169000           | SALUDA RIVER NEAR at COLUMBIA, SC                              | 2     | 10/05/2016--<br>10/06/2016                            |                                                           |
| 02197000           | SAVANNAH RIVER at AUGUSTA, GA                                  | 1     | 12/14/1985                                            |                                                           |
| 02223000           | OCONEE RIVER at MILLEDGEVILLE, GA                              | 1     | 1/15/1991                                             |                                                           |
| 02395980           | ETOWAH RIVER at GA 1 LOOP,<br>NEAR ROME, GA                    | 9     | 10/01/1938,<br>3/8/2017—<br>3/10/2017,<br>03/13/2017, | 03/16/2017 —<br>03/17/2017,<br>05/25/2017 —<br>05/26/2017 |
| 02424000           | CAHABA RIVER at CENTREVILLE, AL                                | 4     | 10/21/2016--<br>10/22/2016                            | 11/06/2016--<br>11/07/2016                                |
| 02465000           | BLACK WARRIOR RIVER at OLIVER LOCK AND<br>DAM at NORTHPORT, AL | 5     | 11/16/2015--<br>11/20/2015                            |                                                           |
